# Supplementary material
Source: publisher figshare collection journal article supplement (https://acs.figshare.com/ndownloader/files/4099378)
Supplement: Supplementary file 1 [file 4099378]

# Bacterial attachment and viscoelasticity: Physicochemical and motility effects analyzed with QCM-D

## Supporting Information

Jenia Gutman<sup>1</sup>, Sharon L. Walker<sup>2</sup>, Viatcheslav Freger<sup>1</sup> and Moshe Herzberg<sup>1\*</sup>

<sup>1</sup> Department of Desalination and Water Treatment, Zuckerberg Institute for Water Research, Albert Katz International School for Desert Studies, Jacob Blaustein Institute for Desert Research, Ben Gurion University of the Negev, Israel 84990

<sup>2</sup> Department of Chemical and Environmental Engineering, University of California, Riverside, California, USA 92521

<sup>3</sup> The Wolfson Department of Chemical Engineering, Technion - Israel Institute of Technology, Haifa 32000, Israel

Revised version Submitted to

*Environmental Science and Technology*

November 21, 2012

\* Corresponding author: Moshe Herzberg, Department of Desalination and Water Treatment, Zuckerberg Institute for Water Research, Ben Gurion University of the Negev, Israel 84990,

Tel: +972-8-6563520, Fax: +972-8-6563503, Email: [herzberg@bgu.ac.il](mailto:herzberg@bgu.ac.il)

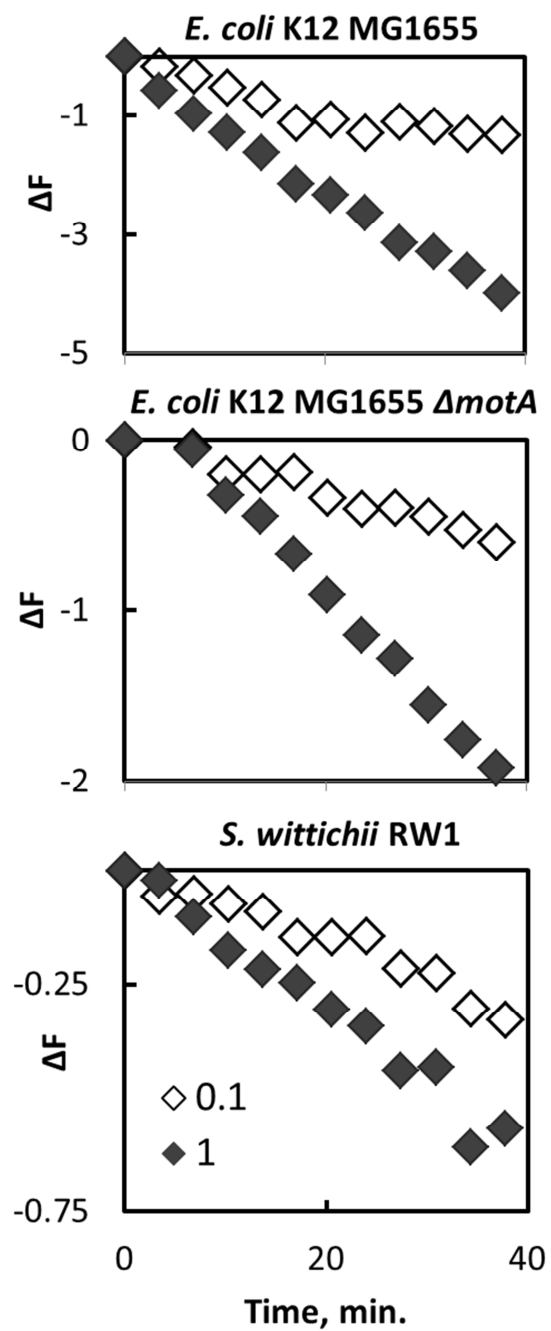

**Figure S1:** Frequency shift ( $\Delta F$ , Hz) of the QCM-D sensor as a function of cell concentration in the feed bacterial suspension (ionic strength of 100 mM with NaCl) injected into the QCM-D flow-cell. Open diamonds: OD<sub>600</sub>=0.1; Filled diamonds: OD<sub>600</sub>=1.
